# Supplementary material
Source: PubMed Central journal article supplement (PMC4333761)
Supplement: NIHMS62224-supplement-Supplementary_Table.pdf [file NIHMS62224-supplement-Supplementary_Table.pdf]

|                                      | group I                                                | group II                     | group III                    | BAF          | Lamins                       |
|--------------------------------------|--------------------------------------------------------|------------------------------|------------------------------|--------------|------------------------------|
| <i>Arabidopsis thaliana</i>          |                                                        | NP_199468                    |                              |              |                              |
| <i>Blastocystis hominis</i>          |                                                        | CBK19783                     |                              | (CBJ48376)   |                              |
| <i>Trichomonas vaginalis</i>         |                                                        | XP_001313092                 |                              |              |                              |
| <i>Tetrahymena thermophila</i>       |                                                        | XP_001011171                 |                              |              |                              |
| <i>Naegleria gruberi</i>             |                                                        | XP_002679745                 |                              |              |                              |
| <i>Dictyostelium discoideum</i>      |                                                        | XP_629358                    |                              |              |                              |
| <i>Schizosaccharomyces pombe</i>     |                                                        | NP_593673                    |                              |              |                              |
| <i>Saccharomyces cerevisiae</i>      |                                                        | NP_013679                    |                              |              |                              |
| <i>Trichoplax adherens</i>           | XP_002108184                                           |                              | XP_002110392<br>XP_002117666 | XP_002115766 | XP_002107946                 |
| <i>Hydra magnipapillata</i>          |                                                        | XP_002168667                 | XP_002166547                 | XP_002160122 | XP_002166189                 |
| <i>Caenorhabditis elegans</i>        | NP_490907                                              | NP_496944                    | NP_492539<br>NP_001023514    | NP_499085    | NP_492371                    |
| <i>Trichinella spiralis</i>          | XP_003371756                                           | XP_003381262                 | XP_003371507<br>XP_003375645 | XP_003378673 | XP_003372156                 |
| <i>Drosophila melanogaster</i>       | NP_649917<br>NP_476664                                 | NP_611873                    | NP_610099<br>NP_573221       | NP_609176    | NP_476616<br>AAF58237        |
| <i>Strongylocentrotus purpuratus</i> |                                                        | XP_786690                    | XP_001188048                 | XP_787992    | AAB34118                     |
| <i>Oikopleura dioica</i>             | CBY38777                                               | CBY34599                     | CBY33101                     | CBY08767     | CAL69618                     |
| <i>Ciona intestinalis</i>            | XP_002123380                                           | XP_002120220                 | XP_002123443<br>*predicted   | XP_002131759 | NP_001093902                 |
| <i>Danio rerio</i>                   | NP_001018434<br>XP_001924046                           | AAI63283                     | NP_001119867<br>AAH68429     | NP_991125    | CAB58234<br>AAL27547         |
| <i>Xenopus laevis</i>                | NP_001089080<br>AAC05382                               | AAI55877                     | *predicted<br>XP_002931925   | NP_001087314 | NP_001080053<br>NP_001095210 |
| <i>Gallus gallus</i>                 | NP_001006235                                           | XP_418032<br>XP_416073       | XP_415084                    | XP_001236935 | NP_990617<br>NP_990618       |
| <i>Ornithorhynchus anatinus</i>      | XP_001508363<br>XP_001505997<br>*predicted             | XP_001517039<br>XP_001510437 | XP_001519527<br>XP_001510952 | XP_001515472 | XP_001521528                 |
| <i>Monodelphis domestica</i>         | XP_001373875<br>XP_001364662<br>XP_001364803           | XP_001377888                 | XP_001370039<br>XP_001377857 | XP_001365429 | XP_001367284                 |
| <i>Homo sapiens</i>                  | NP_000108<br>NP_001185979<br>NP_003267<br>NP_001027454 | NP_851853<br>NP_055134       | AAI25275<br>AAH43157         | NP_003851    | AAC37575<br>AAW32538         |
